# Supplementary material for: Moderating effect of mode of delivery on the genetics of intelligence: Explorative genome‐wide analyses in ALSPAC
Source: PubMed Central journal article supplement (PMC6305932; doi:10.1002/brb3.1144), 2018-10-31
Supplement: BRB3-8-e01144-s001.pdf [file BRB3-8-e01144-s001.pdf]

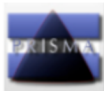

## PRISMA 2009 Flow Diagram

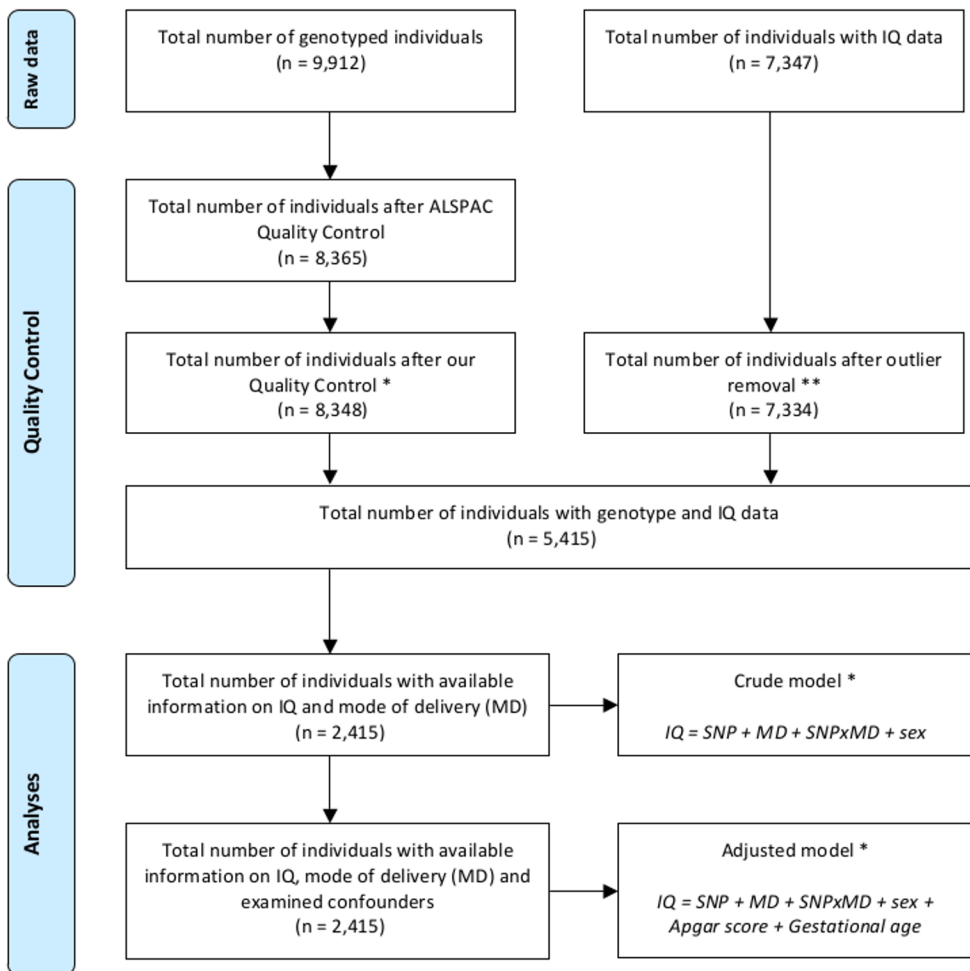

\* softwares used: plink and R

\*\* software used: SPSS

From: Moher D, Liberati A, Tetzlaff J, Altman DG, The PRISMA Group (2009). Preferred Reporting Items for Systematic Reviews and Meta-Analyses: The PRISMA Statement. PLoS Med 6(7): e1000097. doi:10.1371/journal.pmed1000097

For more information, visit [www.prisma-statement.org](http://www.prisma-statement.org).
